# Supplementary material for: Gas Chromatography-Mass Spectrometry and Single Nucleotide Polymorphism-Genotype-By-Sequencing Analyses Reveal the Bean Chemical Profiles and Relatedness of Coffea canephora Genotypes in Nigeria
Source: MDPI journal article supplement (doi:10.3390/plants8100425), 2019-10-18
Supplement: s1 [file s1]

## Supplemental Information

### Gas Chromatography-Mass Spectrometry and Single Nucleotide Polymorphism-Genotype-By-Sequencing reveal the chemotypes of *C. canephora* genotypes Nigeria

**Supplementary Table 1: The eight classes of metabolites identified in the Nigerian *C. canephora* coffee genotypes.** Metabolite classes include amines, amino acids, fatty acid, organic/inorganic compounds, polyphenol, sugar derivatives, sugar and vitamins. Metabolites in bold have the highest concentration within each of the classes. Metabolites in the top rows within a class are most abundant, and those in the bottom row are least abundant.

| <b>Amines</b>                      |                     |                          |                        |
|------------------------------------|---------------------|--------------------------|------------------------|
| <b>Putrescine</b>                  | Tyramine            | Urea                     | Uric acid              |
| Uridine                            | Guanosine           | Pseudo uridine           | Maleimide              |
| Hydroxylamine                      |                     |                          |                        |
| <b>Amino acids</b>                 |                     |                          |                        |
| <b>Aspartic acid</b>               | Glutamic acid       | Proline                  | Tryptophan             |
| Phenylalanine                      | Homoserine          | Cysteine                 | Trans-4-hydroxyproline |
| Citrulline                         | Tyrosine            | Isoleucine               | Beta-alanine           |
| Alanine                            | Glycine             | Methionine               | Valine                 |
| Leucine                            | Beta-glutamic acid  | N-acetyl-D-galactosamine | Serine                 |
| Histidine                          | Threonine           | Cyanoalanine             | Asparagine             |
| Lysine                             | Glutamine           | Oxoproline               |                        |
| <b>Fatty acid</b>                  |                     |                          |                        |
| <b>Stearic acid</b>                | Glycerol            | Palmitic acid            | Linoleic acid          |
| Pelargonic acid                    | Lactic acid         | Oleic acid               | Cis-gondoic acid       |
| Arachidic acid                     | Lauric acid         | Isohexonic acid          | Stigmasterol           |
| Capric acid                        | Hexadecylglycerol   | Nonadecanoic acid        | Lignoceric acid        |
| 1-monoolein                        | 1-monopalmitin      |                          |                        |
| <b>Organic/inorganic compounds</b> |                     |                          |                        |
| <b>Citric acid</b>                 | Malic acid          | Fumaric acid             | Maleic acid            |
| 2-hydroxyglutaric                  | Alpha-ketoglutarate | Lithocholic acid         | Allantoic acid         |
| 5-hydroxy-3-indole                 | Isocitric acid      | Aconitic acid            | 2-deoxytetronic acid   |

|                                 |                                      |                                       |                             |
|---------------------------------|--------------------------------------|---------------------------------------|-----------------------------|
| D-erthro-sphingos Phosphate     | Adipic acid                          | Succinic acid                         | Shikimic acid               |
| Benzoic acid                    | Pipecolinic acid                     | Alpha-aminoadipic acid                | 4-aminobutyric acid         |
|                                 | 3,4-dihydroxyhydrocinnamic acid NIST | 3-hydroxybenzoic acid                 | Digalacturonic acid         |
| Itaconic acid                   | Propane-1,3-diol                     | Vanillic acid                         | Glucosaminic acid           |
| Citramalic acid                 | 3,4-dihydroxybenzoate                | Tartaric acid                         | 4-hydroxybenzoate           |
| Oxalic acid                     |                                      |                                       |                             |
| <b>Phenolic acids/Alkaloids</b> |                                      |                                       |                             |
| <b>Caffeine</b>                 | Chlorogenic acid                     | Quinic acid                           | 3,4-dihydroxy-cinnamic acid |
| Gluconic acid                   | Ferulic acid                         | Gluconic acid lactone                 | Beta-sitosterol             |
| Tocopherol beta NIST            | Isochlorogenic acid                  | Tyrosol                               | Nornicotine                 |
| <b>Sugar derivatives</b>        |                                      |                                       |                             |
| <b>Galactinol</b>               | 5-methoxytryptamine                  | Saccharic acid                        | Glycerol-3-galactoside      |
| 6-deoxyglucitol                 | Mannitol                             | 1-methylgalactose                     | Butane-2,3-diol NIST        |
| Lactobionic acid                | 3,6-andro-D-galactose                | Glucose-1-phosphate                   | 1,2-andro-myo-inositol      |
| Ribonic acid                    | Catechinflavan-3-ol                  | Methanolphosphate                     | 5-hydroxynorvaline NIST     |
| Conduritol-beta-epoxide         | 2-monoolein                          | 1-monostearin                         | Galactitol                  |
| Galactonic acid                 | Maltitol                             | Hexitol                               | Hydroquinoaromatic          |
| Arbutin                         | Lactitol                             | 4',5-dihydroxy-7-glucosyloxyflavanone | Threonic acid               |
| Glycolic acid                   | 6-deoxyglucose                       | 2-monostearin NIST                    | Butyrolactam NIST           |
| Glycerol-alpha-phosphate        | Lyxitol                              | Arabitol                              | UDP-glucuronic acid         |
| Isothreonic acid                | Glyceric acid                        | Erythritol                            | Mucic acid                  |
| <b>Sugars</b>                   |                                      |                                       |                             |
| <b>Sucrose</b>                  | Fructose                             | Glucose                               | Galactose                   |
| Sophorose                       | Threitol                             | Palatinitol                           | Sorbitol                    |
| Pentitol                        | Inulotriose                          | Melezitose                            | Tagatose                    |
| Raffinose                       | N-acetyl-D-mannosamine               | Beta-gentiobiose                      | Fucose                      |
| Xylose                          | Trisaccharide                        | Mannose                               |                             |

## Vitamins

|                     |                                   |                          |
|---------------------|-----------------------------------|--------------------------|
| <b>Myo-inositol</b> | Nicotinic acid (Vit B3) or Niacin | Inositol-4-monophosphate |
|---------------------|-----------------------------------|--------------------------|

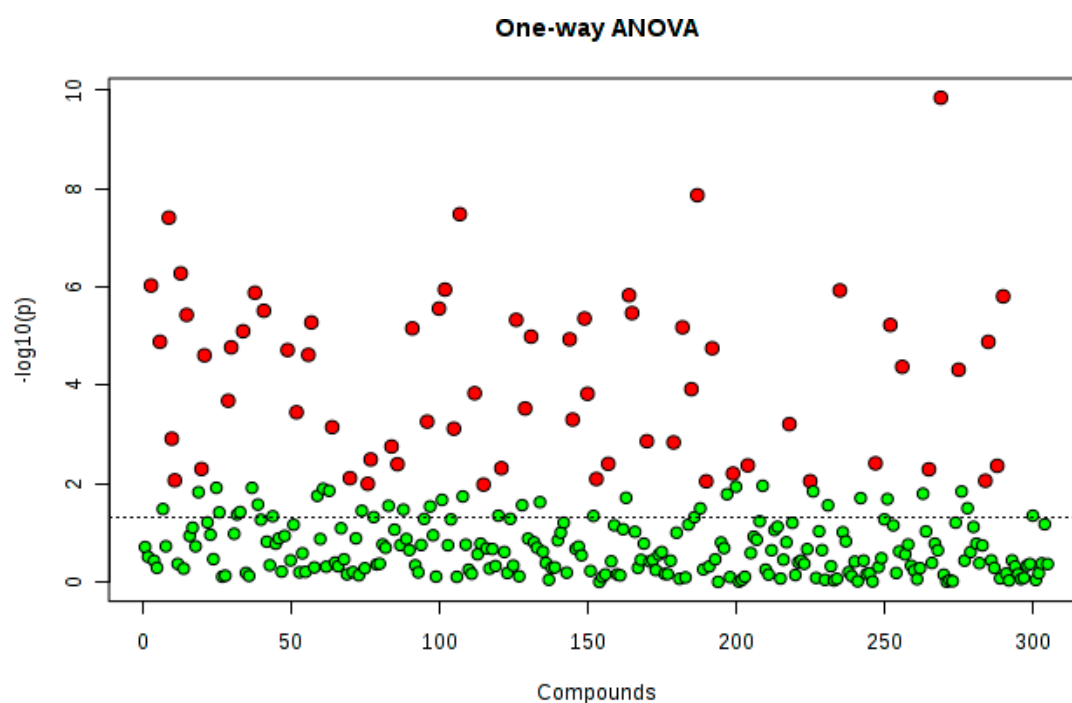

**Figure S1. Metabolites detected by One-Way Analysis of variation that significantly varied across genotypes.** With the statistical significant level cut-off at 2 ( $p=0.01$ ), there were 66 metabolites (red circles) that met this criteria.

**Supplementary Table 2: Fatty acids with high Pearson's Coefficient correlative scores ( $r^2>0.80$ ;  $p<0.05$ )**

|                | Glycerol | Linoleic acid | Arachidic acid | Stearic acid | Palmitic acid |
|----------------|----------|---------------|----------------|--------------|---------------|
| Glycerol       | 1        | 0.89409       | 0.83245        | 0.80049      | 0.88363       |
| Linoleic acid  | 0.89409  | 1             | 0.86853        | 0.88823      | 0.91323       |
| Arachidic acid | 0.83245  | 0.86853       | 1              | 0.82577      | 0.85591       |
| Stearic acid   | 0.80049  | 0.88823       | 0.82577        | 1            | 0.89874       |
| Palmitic acid  | 0.88363  | 0.91323       | 0.85591        | 0.89874      | 1             |
